# Supplementary material for: Cross-Sectional Dating of Novel Haplotypes of HERV-K 113 and HERV-K 115 Indicate These Proviruses Originated in Africa before Homo sapiens
Source: PubMed Central journal article supplement — Mol Biol Evol. 2009 Aug 10;26(11):2617–26. doi: 10.1093/molbev/msp180 (PMC2760466; doi:10.1093/molbev/msp180), 2009-08-10
Supplement: msp180_1.pdf [file msp180_1.pdf]

# A.

**Input PCR template** none  
**Specificity of primers** Target templates were found in selected database: Genome database (reference assembly only) for selected species (Organism limited to Homo sapiens)

## ▼ Detailed primer reports

### K113 insertion site primers

|                | Sequence (5'->3')    | Length | Tm    | GC%    |
|----------------|----------------------|--------|-------|--------|
| Forward primer | GCATGGGGAGATTCAGAACC | 20     | 61.78 | 55.00% |
| Reverse primer | CATGTTTCCTGTCTGCCAC  | 20     | 61.53 | 55.00% |

#### Products on target templates

>[NT\\_011295.10](#) Homo sapiens chromosome 19 genomic contig, reference assembly

product length = 303

Features flanking this product:

[2568 bp at 5' side: similar to hCG1776607](#)

[67749 bp at 3' side: zinc finger protein 100](#)

|                |          |                      |          |
|----------------|----------|----------------------|----------|
| Forward primer | 1        | GCATGGGGAGATTCAGAACC | 20       |
| Template       | 13035377 | .....                | 13035358 |
| Reverse primer | 1        | CATGTTTCCTGTCTGCCAC  | 20       |
| Template       | 13035075 | .....                | 13035094 |

# B.

**Input PCR template** none  
**Specificity of primers** Target templates were found in selected database: Genome database (reference assembly only) for selected species (Organism limited to Homo sapiens)

## ▼ Detailed primer reports

### K115 insertion site primers

|                | Sequence (5'->3')    | Length | Tm    | GC%    |
|----------------|----------------------|--------|-------|--------|
| Forward primer | CCGCACCTAGTCAACTTAGC | 20     | 57.66 | 55.00% |
| Reverse primer | TCAGTTCCCGATTTTCTGCC | 20     | 62.41 | 50.00% |

#### Products on target templates

>[NT\\_077531.3](#) Homo sapiens chromosome 8 genomic contig, reference assembly

product length = 557

Features associated with this product:

[defensin, beta 107A precursor](#)

|                |        |                      |        |
|----------------|--------|----------------------|--------|
| Forward primer | 1      | CCGCACCTAGTCAACTTAGC | 20     |
| Template       | 146301 | .....                | 146320 |
| Reverse primer | 1      | TCAGTTCCCGATTTTCTGCC | 20     |
| Template       | 146857 | .....                | 146838 |
