# Supplementary material for: Cross-Sectional Dating of Novel Haplotypes of HERV-K 113 and HERV-K 115 Indicate These Proviruses Originated in Africa before Homo sapiens
Source: PubMed Central journal article supplement — Mol Biol Evol. 2009 Aug 10;26(11):2617–26. doi: 10.1093/molbev/msp180 (PMC2760466; doi:10.1093/molbev/msp180), 2009-08-10
Supplement: msp180_3.pdf [file msp180_3.pdf]

## A. K113 Haplotype Sequences

|                   |            |            |             |            |             |            |     |
|-------------------|------------|------------|-------------|------------|-------------|------------|-----|
| AY037928_K113_GCC | TGTGGGGAAA | AGCAAGAGAG | ATCAGATTGT  | TACTGTGTCT | GTGTAGAAAAG | AAGTAGACAT |     |
| K113_AGC          | -----      | -----      | -----       | -----      | -----       | -----      |     |
| K113_ATC          | -----      | -----      | -----       | -----      | -----       | -----      |     |
| K113_ATT          | -----      | -----      | -----       | -----      | -----       | -----      | 60  |
| AY037928_K113_GCC | AGGAGACTCC | ATTTTGTAT  | GTAATAAGAA  | AAATCTTCT  | GCCTTGAGAT  | TCTGTTAATC |     |
| K113_AGC          | -----      | -----      | -----       | -----      | -----       | -----      |     |
| K113_ATC          | -----      | -----      | -----       | -----      | -----       | -----      |     |
| K113_ATT          | -----      | -----      | -----       | -----      | -----       | -----      | 120 |
| AY037928_K113_GCC | TATGACCTTA | CCCCAACCC  | CGTGTCTCT   | GAAACATGTG | CTGTGTCAAC  | TCAGAGTTGA |     |
| K113_AGC          | -----      | -----      | -----       | -----      | -----       | ---A-----  |     |
| K113_ATC          | -----      | -----      | -----       | -----      | -----       | ---A-----  |     |
| K113_ATT          | -----      | -----      | -----       | -----      | -----       | ---A-----  | 180 |
| AY037928_K113_GCC | ATGGATTAAG | GGCGGTGCAG | GATGTGCTTT  | GTTAAACAGA | TGCTTGAAGG  | CAGCATGCTC |     |
| K113_AGC          | -----      | -----      | -----       | -----      | -----       | -----      |     |
| K113_ATC          | -----      | -----      | -----       | -----      | -----       | -----      |     |
| K113_ATT          | -----      | -----      | -----       | -----      | -----       | -----      | 240 |
| AY037928_K113_GCC | CTTAAGAGTC | ATCACCACTC | CCTAATCTCA  | AGTACCCAGG | GACACAAAAA  | CTGCGGAAGG |     |
| K113_AGC          | -----      | -----      | -----       | -----      | -----       | -----      |     |
| K113_ATC          | -----      | -----      | -----       | -----      | -----       | -----      |     |
| K113_ATT          | -----      | -----      | -----       | -----      | -----       | -----      | 300 |
| AY037928_K113_GCC | CCGCAGGGAC | CTCTGCCTAG | GAAAGCCAGG  | TATTGTCCAA | GGTTTCTCCC  | CATGTGATAG |     |
| K113_AGC          | -----      | -----      | -----       | -----      | -----       | -----      |     |
| K113_ATC          | -----      | -----      | -----       | -----      | -----       | -----      |     |
| K113_ATT          | -----      | -----      | -----       | -----      | -----       | -----      | 360 |
| AY037928_K113_GCC | TCTGAAATAT | GGCCTCGTGG | GAAGGGAAAAG | ACCTGACCGT | CCCCCAGCCC  | GACACCCGTA |     |
| K113_AGC          | -----      | -----      | -----       | -----      | -----       | -----      |     |
| K113_ATC          | -----      | -----      | -----       | -----      | -----       | -----      |     |
| K113_ATT          | -----      | -----      | -----       | -----      | -----       | -----      | 420 |
| AY037928_K113_GCC | AAGGGTCTGT | GCTGAGGAGG | ATTAGTATAA  | GAGGAAGGAA | TGCCTCTTGC  | AGTTGAGACA |     |
| K113_AGC          | -----      | -----      | -----       | -----      | -----       | -----      |     |
| K113_ATC          | -----      | -----      | -----       | -----      | -----       | -----      |     |
| K113_ATT          | -----      | -----      | -----       | -----      | -----       | -----      | 480 |
| AY037928_K113_GCC | AGAGGAAGGC | ATCTGTCTCC | TCCCTGTCCC  | TGGGCAATGG | AATGTCTCGG  | TATAAAACCC |     |
| K113_AGC          | -----      | -----      | -----       | -----      | -----       | -----      |     |
| K113_ATC          | -----      | -----      | -----       | -----      | -----       | -----      |     |
| K113_ATT          | -----      | -----      | -----       | -----      | -----       | -----      | 540 |
| AY037928_K113_GCC | GATTGTATGC | TCCATCTACT | GAGATAGGGA  | AAAACCGCCT | CAGGGCTGGA  | GGTGGGACCT |     |
| K113_AGC          | -----      | -----      | -----       | -----      | G-----      | -----      |     |
| K113_ATC          | -----      | -----      | -----       | -----      | T-----      | -----      |     |
| K113_ATT          | -----      | -----      | -----       | -----      | T-----      | -----      | 600 |
| AY037928_K113_GCC | GCGGGCAGCA | ATACTGCTTT | GTAAAGCACT  | GAGATG     |             |            |     |
| K113_AGC          | -----      | -----      | -----       | -----      |             |            |     |
| K113_ATC          | -----      | -----      | -----       | -----      |             |            |     |
| K113_ATT          | -----      | -----      | -----T-     | -----      |             |            |     |

## B. K115 Haplotype Sequences

|                    |            |            |             |            |             |            |     |
|--------------------|------------|------------|-------------|------------|-------------|------------|-----|
| AY037929_K115_CAGA | TGTGGGGAAA | AGCAAGAGAG | ATCAGATTGT  | TACTGTGTCT | GTGTAGAAAAG | AAGTAGACAT |     |
| K115_CAAA          | -----      | -----      | -----       | -----      | -----       | -----      |     |
| K115_CCGC          | -----      | -----      | -----       | -----      | -----       | -----      |     |
| K115_TAGC          | -----      | -----      | -----       | -----      | -----       | -----      |     |
| K115_TCGC          | -----      | -----      | -----       | -----      | -----       | -----      | 60  |
| AY037929_K115_CAGA | AGGAGACTCC | ATTTTGTAT  | GTACTAAGAA  | AAATCTTCT  | GCCTTGAGAT  | TCTGTGACCT |     |
| K115_CAAA          | -----      | -----      | -----       | -----      | -----       | -----      |     |
| K115_CCGC          | -----      | -----      | -----       | -----      | -----       | -----      |     |
| K115_TAGC          | -----      | -----      | -----       | -----      | -----       | -----      |     |
| K115_TCGC          | -----      | -----      | -----       | -----      | -----       | -----      | 120 |
| AY037929_K115_CAGA | TACCCCAAC  | CCCGTGCTCT | CTGAAATGTG  | TGCTGTGTCA | ACTCAGAGTT  | AAATGGATTA |     |
| K115_CAAA          | -----      | -----      | -----       | -----      | -----       | -----      |     |
| K115_CCGC          | -----      | -----      | -----       | -----      | -----       | -----      |     |
| K115_TAGC          | -----      | -----      | -----       | -----      | -----       | -----      |     |
| K115_TCGC          | -----      | -----      | -----       | -----      | -----       | -----      | 180 |
| AY037929_K115_CAGA | AGGGCGGTGC | AGGATGTGCT | TTGTAAACA   | GATGCTTGAA | GGCAGCATGC  | TCCTTAAGAG |     |
| K115_CAAA          | -----      | -----      | -----       | -----      | -----       | -----      |     |
| K115_CCGC          | -----      | -----      | -----       | -----      | -----       | -----      |     |
| K115_TAGC          | -----      | -----      | -----       | -----      | -----       | -----      |     |
| K115_TCGC          | -----      | -----      | -----       | -----      | -----       | -----      | 240 |
| AY037929_K115_CAGA | TCATCACCAC | TCCCTAATCT | CAAGTACCCA  | GGGACACAAA | AACTGCGGAA  | GGCCGCAGGG |     |
| K115_CAAA          | -----      | -----      | -----       | -----      | -----       | -----      |     |
| K115_CCGC          | -----      | -----      | -----       | -----      | -----       | -----      |     |
| K115_TAGC          | -----      | -----      | -----T----- | -----      | -----       | -----      |     |
| K115_TCGC          | -----      | -----      | -----T----- | -----      | -----       | -----      | 300 |
| AY037929_K115_CAGA | ACCTCTGCCT | AGGAAAGCCA | GGTATTGTCC  | AAGGTTTCTC | CCCATGTGAT  | AGTCTGAAAT |     |
| K115_CAAA          | -----      | -----      | -----       | -----      | -----       | -----      |     |
| K115_CCGC          | -----      | -----      | -----       | -----      | -----       | -----      |     |
| K115_TAGC          | -----      | -----      | -----       | -----      | -----       | -----      |     |
| K115_TCGC          | -----      | -----      | -----       | -----      | -----       | -----      | 360 |
| AY037929_K115_CAGA | ATGGCCTCGT | GGGAAGGGAA | AGACATGACC  | GTCCCCCAGC | CCGATACCCG  | TAAAGGGTCT |     |
| K115_CAAA          | -----      | -----      | -----       | -----      | -----A      | -----      |     |
| K115_CCGC          | -----      | -----      | -----C----- | -----      | -----       | -----      |     |
| K115_TAGC          | -----      | -----      | -----       | -----      | -----       | -----      |     |
| K115_TCGC          | -----      | -----      | -----C----- | -----      | -----       | -----      | 420 |
| AY037929_K115_CAGA | GTGCTGAGGA | GGATTAGTAA | AAGAGGAAGG  | AATGCCTCTT | GCAGTTGAGA  | CAAGAGGAAG |     |
| K115_CAAA          | -----      | -----      | -----       | -----      | -----       | -----      |     |
| K115_CCGC          | -----      | -----      | -----       | -----      | -----       | -----      |     |
| K115_TAGC          | -----      | -----      | -----       | -----      | -----       | -----      |     |
| K115_TCGC          | -----      | -----      | -----       | -----      | -----       | -----      | 480 |
| AY037929_K115_CAGA | GCATCTGTCT | CCTGCCTGTC | CCTGGGCAAT  | GGAATGTCTC | GGTATAAAAC  | CCGATTGTAT |     |
| K115_CAAA          | -----      | -----      | -----       | -----      | -----       | -----      |     |
| K115_CCGC          | -----      | -----      | -----       | -----      | -----       | -----      |     |
| K115_TAGC          | -----      | -----      | -----       | -----      | -----       | -----      |     |
| K115_TCGC          | -----      | -----      | -----       | -----      | -----       | -----      | 540 |
| AY037929_K115_CAGA | GCTCCATCTA | CTGAGATAGG | GAAAAACCGC  | CTTAGGGCTG | GAGGTGGGAC  | CTGCGGGCAG |     |
| K115_CAAA          | -----      | -----      | -----       | -----      | -----       | -----      |     |
| K115_CCGC          | -----      | -----      | -----       | -----      | -----       | -----      |     |
| K115_TAGC          | -----      | -----      | -----       | -----      | -----       | -----      |     |
| K115_TCGC          | -----      | -----      | -----       | -----      | -----       | -----      | 600 |
| AY037929_K115_CAGA | CAATACTGCT | TTGTAAAGCA | CTGAGATGTT  | TATGTGTATG | CATATCTAAA  | AGCACAGCAC |     |
| K115_CAAA          | -----      | -----      | -----       | -----      | -----       | -----      |     |
| K115_CCGC          | -----      | -----      | -----       | -----      | -----       | -----      |     |
| K115_TAGC          | -----      | -----      | -----       | -----      | -----       | -----      |     |
| K115_TCGC          | -----      | -----      | -----       | -----      | -----       | -----      | 660 |
| AY037929_K115_CAGA | TTAATCCTTT | ACATTGTCTA | TGATGCAAAG  | ACCTTTGTTC | ACGTGTTTGT  | CTGCTGA    |     |
| K115_CAAA          | -----      | -----      | -----       | -----      | -----       | -----      |     |
| K115_CCGC          | -----      | -----      | -----C----- | -----      | -----       | -----      |     |
| K115_TAGC          | -----      | -----      | -----C----- | -----      | -----       | -----      |     |
| K115_TCGC          | -----      | -----      | -----C----- | -----      | -----       | -----      | 717 |
