# Supplementary figures and images for: Cross-Sectional Dating of Novel Haplotypes of HERV-K 113 and HERV-K 115 Indicate These Proviruses Originated in Africa before Homo sapiens
Source: PubMed Central journal article supplement — Mol Biol Evol. 2009 Aug 10;26(11):2617–26. doi: 10.1093/molbev/msp180 (PMC2760466; doi:10.1093/molbev/msp180), 2009-08-10

A.

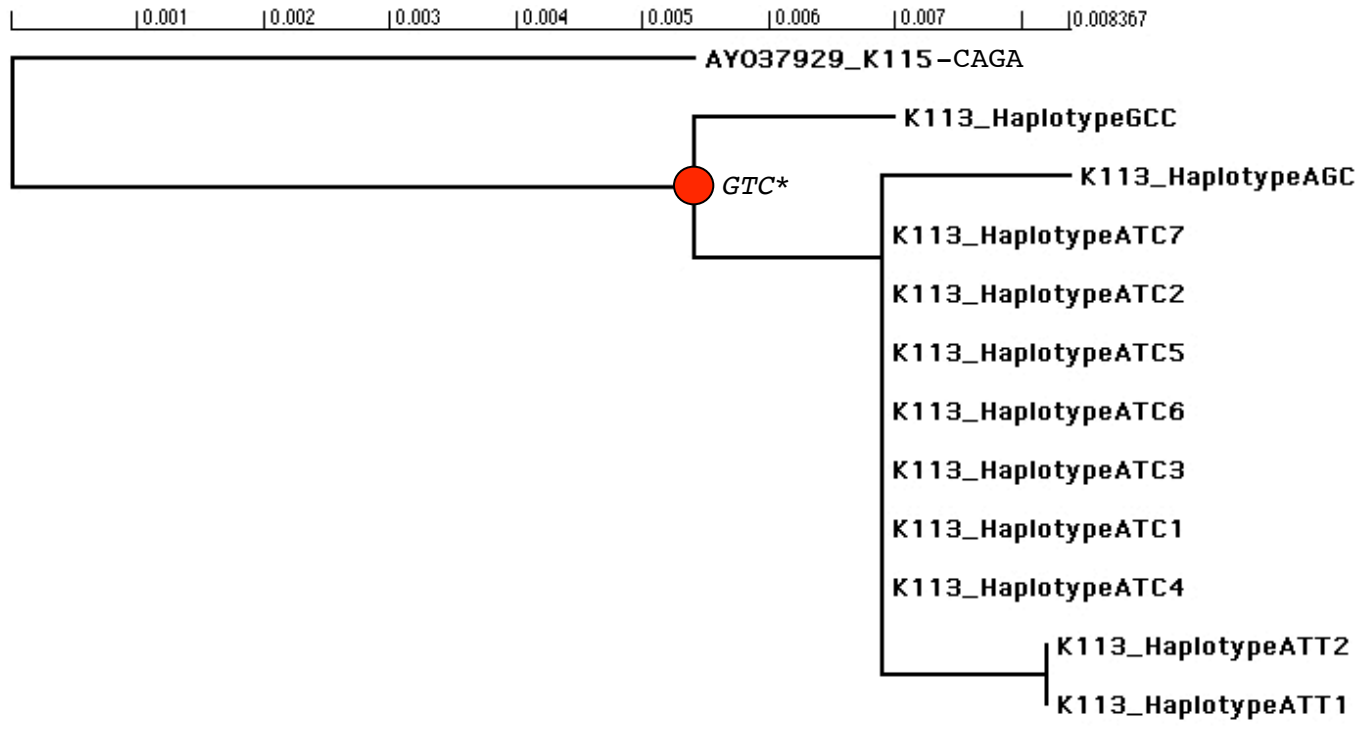

B.

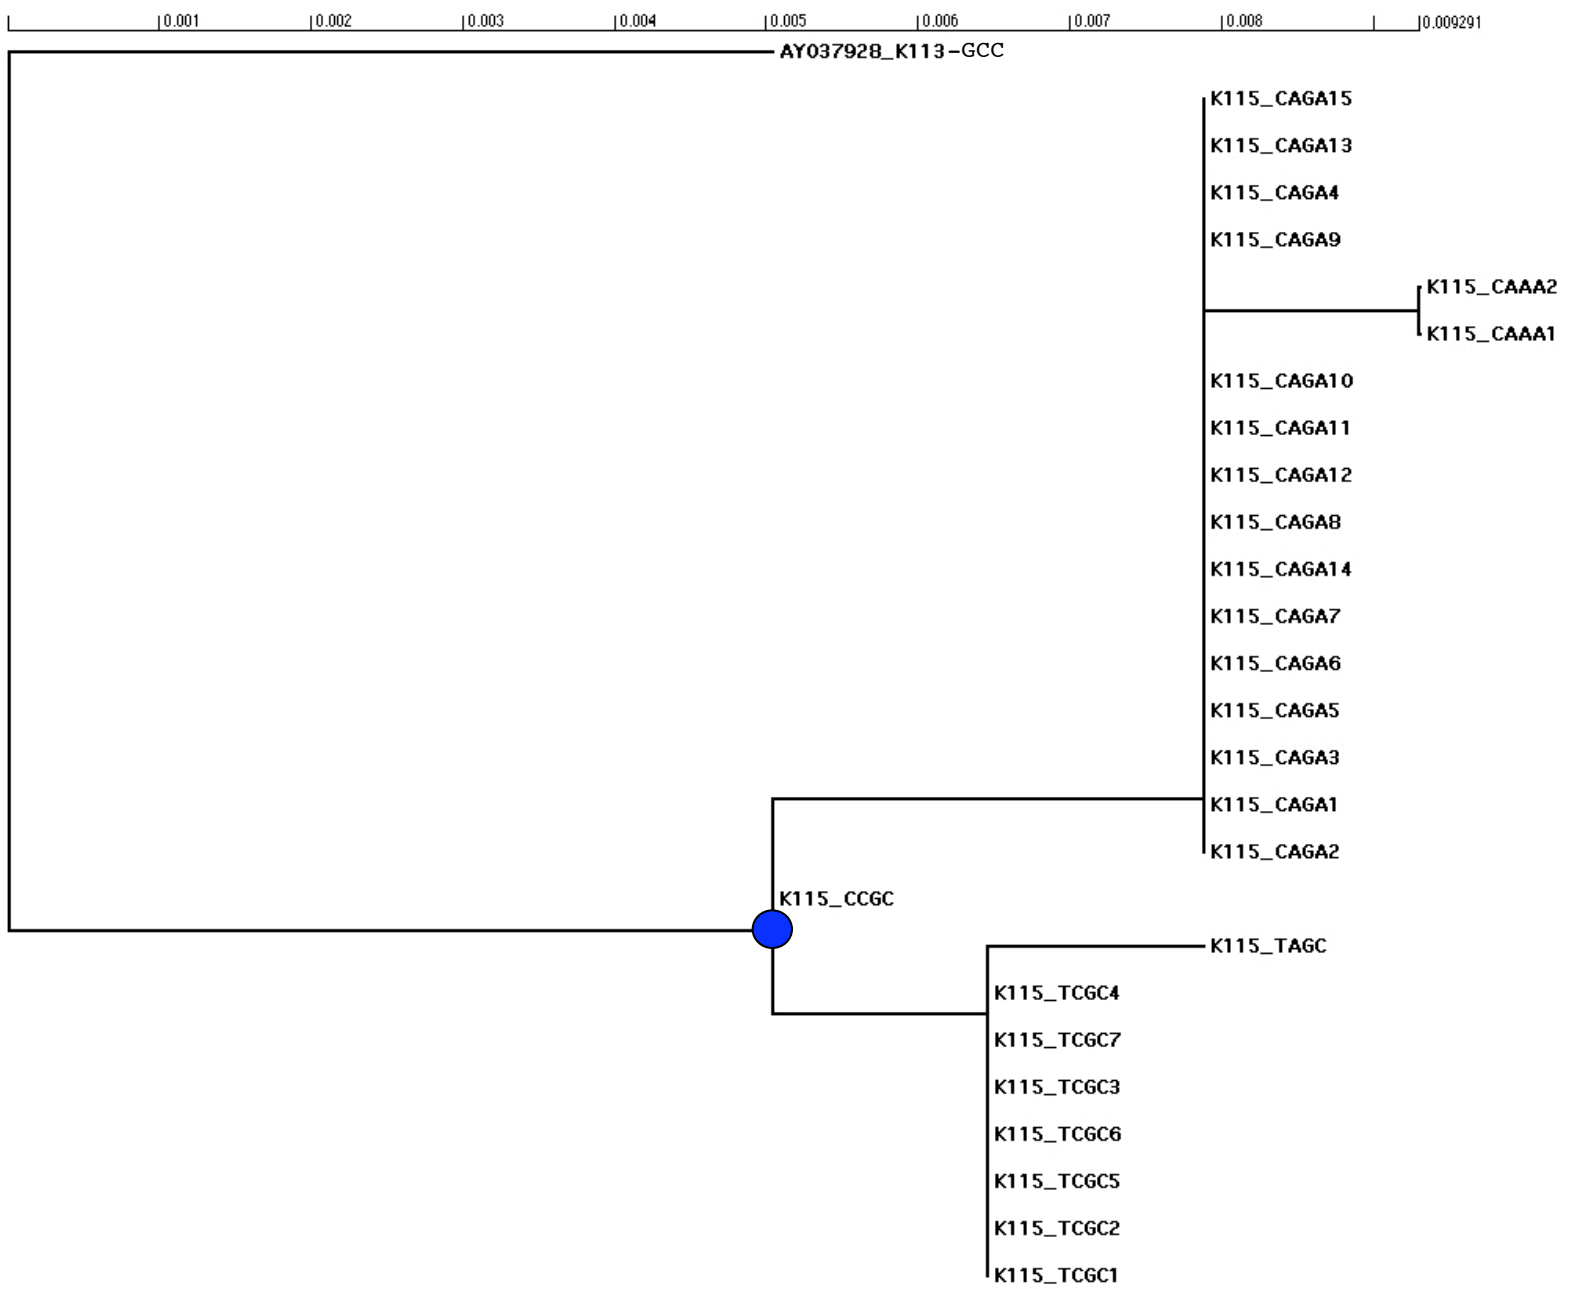

Supplement: msp180_2.pdf [file msp180_2.pdf]
